# Supplementary material for: Supramolecular constructs and thermodynamic stability of four polymorphs and a co-crystal of pentobarbital (nembutal)
Source: Royal Society of Chemistry journal article supplement (doi:10.1039/c2ce06659a), 2012-01-01
Supplement: c2ce06659a.pdf [file c2ce06659a.pdf]

# Electronic Supporting Information

## Supramolecular constructs and thermodynamic stability of four polymorphs and a co-crystal of pentobarbital (nembutal)

Denise Rossi<sup>a</sup>, Thomas Gelbrich<sup>a</sup>, Volker Kahlenberg<sup>b</sup> and Ulrich J. Griesser<sup>\*a</sup>

<sup>a</sup> Institute of Pharmacy, University of Innsbruck, Innrain 52, 6020 Innsbruck, Austria.  
Fax: +43(0)512 507 2939 Tel: 43(0)5125075309; E-mail: [Ulrich.Griesser@uibk.ac.at](mailto:Ulrich.Griesser@uibk.ac.at)

<sup>b</sup> Institute of Mineralogy and Petrography, University of Innsbruck, Innrain 52, 6020 Innsbruck, Austria.

## 1. Preparation methods

**Table S1** Preparation methods of polymorphs of NbtI as described in the literature (for each form, the range of reported melting points is given).

| <i>Polymorphic form, preparation,</i>                                                                                                                  | <i>Reference</i>                                  |
|--------------------------------------------------------------------------------------------------------------------------------------------------------|---------------------------------------------------|
| <b><i>NbtI-I</i> (m.p. 129–131 °C)</b>                                                                                                                 |                                                   |
| Evaporation of a solution in chloroform, by blowing a jet of air over the solution                                                                     | Cleverley & Williams, 1959 <sup>1</sup>           |
| Precipitation from xylene/petroleum ether or ethanol/water                                                                                             | Schulte, 1980 <sup>2</sup>                        |
| Sublimation (needles)                                                                                                                                  | Fischer, 1939 <sup>3</sup>                        |
| Annealing of the melt at 70–80 °C                                                                                                                      | Brandstätter-Kuhnert & Aepkers, 1962 <sup>4</sup> |
| Heating of any other NbtI-form to 120 °C                                                                                                               | Mesley, 1970 <sup>5</sup>                         |
| <b><i>NbtI-II</i> (m.p. 124–126 °C)</b>                                                                                                                |                                                   |
| Evaporating the solvent of a solution in diethylether or dichloromethane or tetrachloromethane under reduced pressure<br>sample temperature: ca. 10 °C | Schulte, 1980 <sup>2</sup>                        |
| Precipitation from NbtI sodium salt, dissolved in water with diluted hydrochloric acid                                                                 | Huang, 1951 <sup>6</sup>                          |
| Evaporation of a solution in carbon tetrachloride, by blowing a jet of air over the solution                                                           | Cleverley & Williams, 1959 <sup>1</sup>           |
| <b><i>NbtI-III</i> (m.p. 113 °C)</b>                                                                                                                   |                                                   |
| Stirring of NbtI-I in water or benzene at 10 °C for 24 hours                                                                                           | Schulte, 1980 <sup>2</sup>                        |
| Sublimation                                                                                                                                            | Brandstätter-Kuhnert & Aepkers, 1962 <sup>4</sup> |
| <b><i>NbtI-IV</i> (m.p. 109 °C)</b>                                                                                                                    |                                                   |
| Spontaneous from the melt (concomitantly with NbtI-I)                                                                                                  | Brandstätter-Kuhnert & Aepkers, 1962 <sup>4</sup> |
| Rotavapor: from chloroform (12–13 °C) under vacuum                                                                                                     | Schulte, 1980 <sup>2</sup>                        |

## 2. Polarised light photomicrographs of forms of NbtI

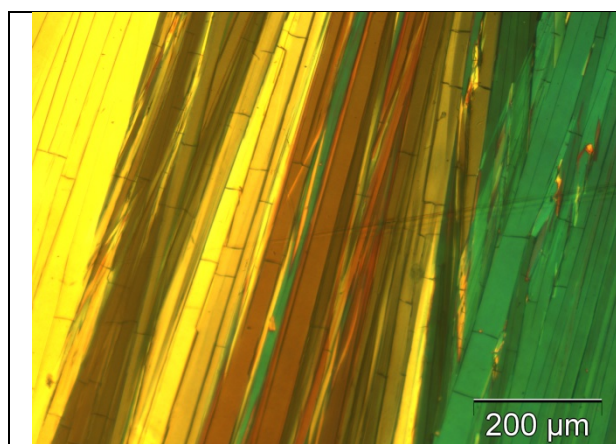

**Fig. S1** Melt film preparation of NbtI-I produced by cooling the melt to about 80 °C

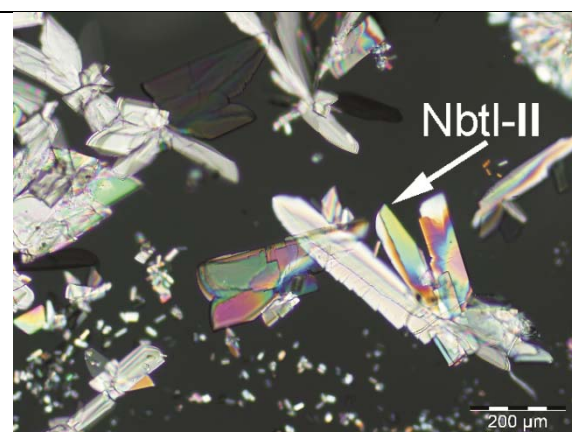

**Fig. S2** Crystals of NbtI-II (large crystals) grown from the melt at 85 °C

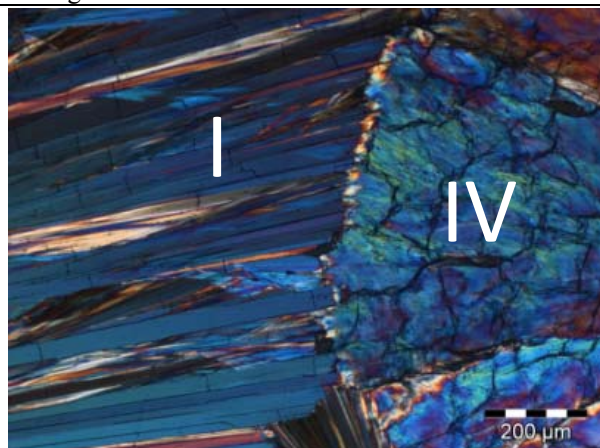

**Fig. S3** Melt-film preparation showing NbtI-I (left) and NbtI-IV (right) produced by annealing the supercooled melt at about 70 °C

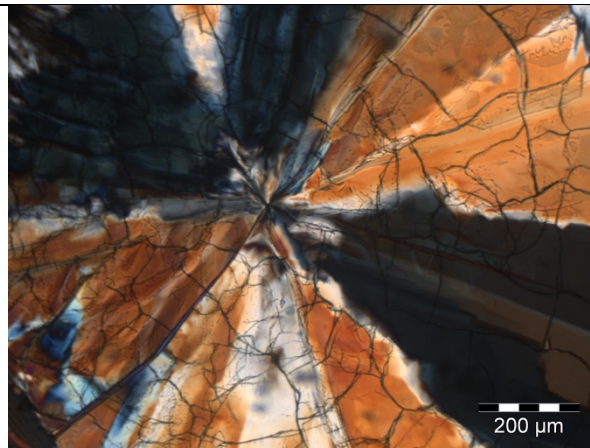

**Fig. S4** Melt film preparation of NbtI-IV produced by annealing the supercooled melt at about 100 °C

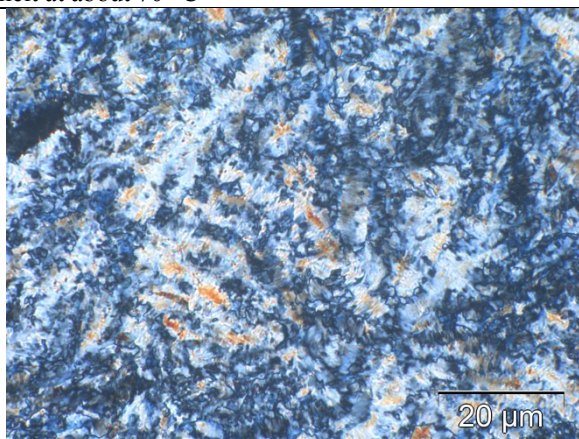

**Fig. S5** Melt film preparation of NbtI produced by keeping the supercooled melt at RT for several hours containing NbtI-I and NbtI-II

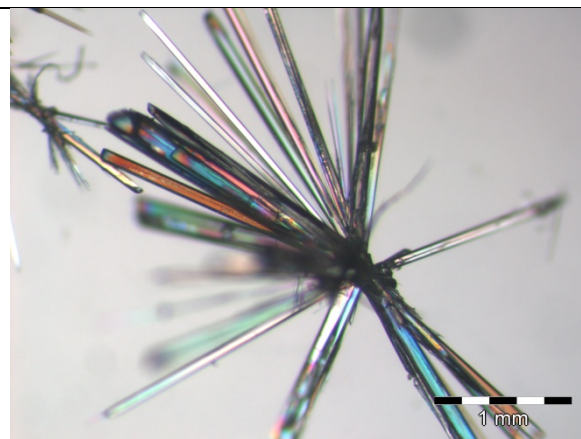

**Fig. S6** Co-crystal of NbtI·PbtI produced from mesitylen



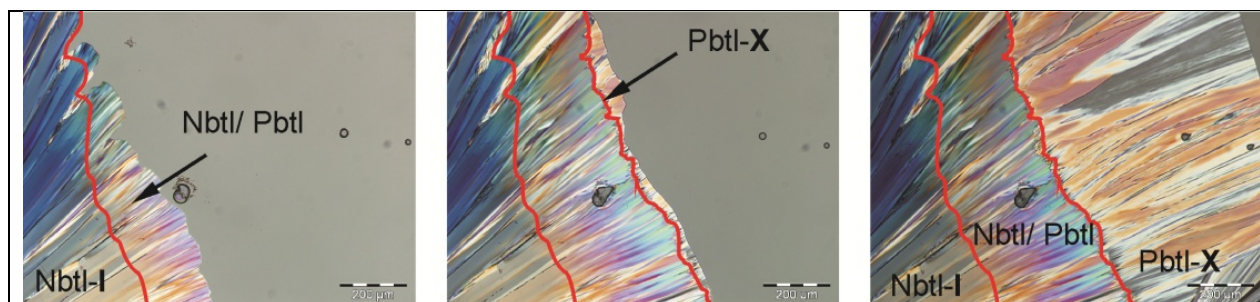

**Fig. S7** Microscopic image of a contact preparation of NbtI (left part of the image) with PbtI (right part of the image). Left: sample at 90 °C showing the growth of NbtI-I into the contact zone forming the co-crystal NbtI·PbtI with similar morphological features. Centre and right: the NbtI-PbtI co-crystal grows within the contact zone (between the red lines) and induces the formation of PbtI-X which is isomorphous to the co-crystal (sample at 95 °C and 105 °C).

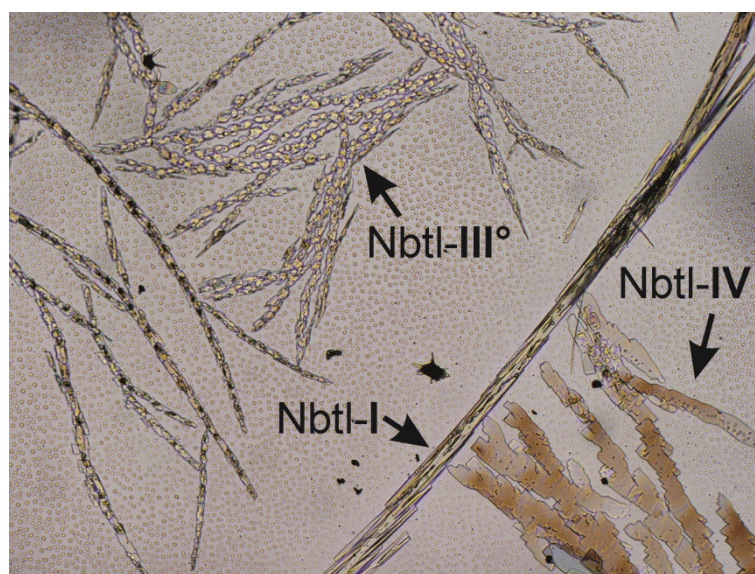

**Fig. S8** Photomicrograph of sublimates of NbtI forms. The samples were sublimed from one object slide to another (90 °C, Kofler hot-bench), using a glass ring with a height of 5 mm.

### 3. Comparison of PXRD patterns

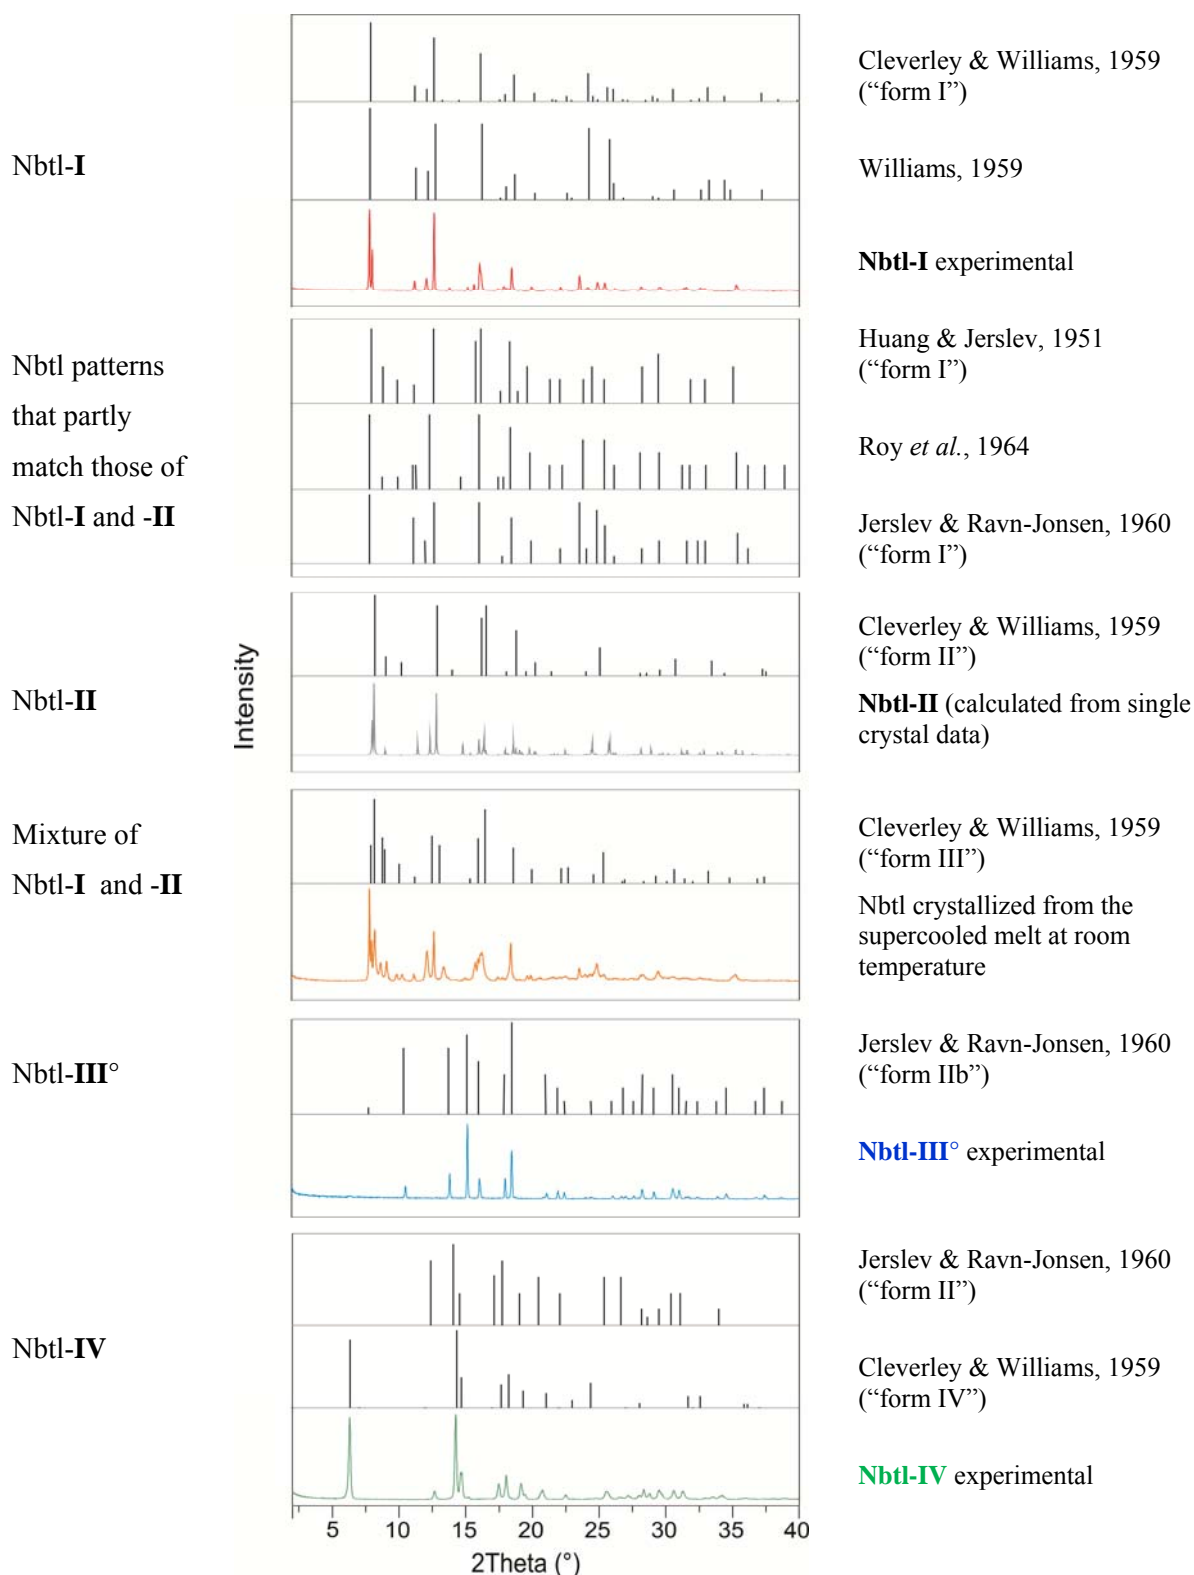

**Fig. S9:** Summary of X-ray powder diffraction patterns of NbtI from different literature sources (see also Table S1) in comparison with the reference patterns for the polymorphs characterised in the present study.

#### 4. Disorder models

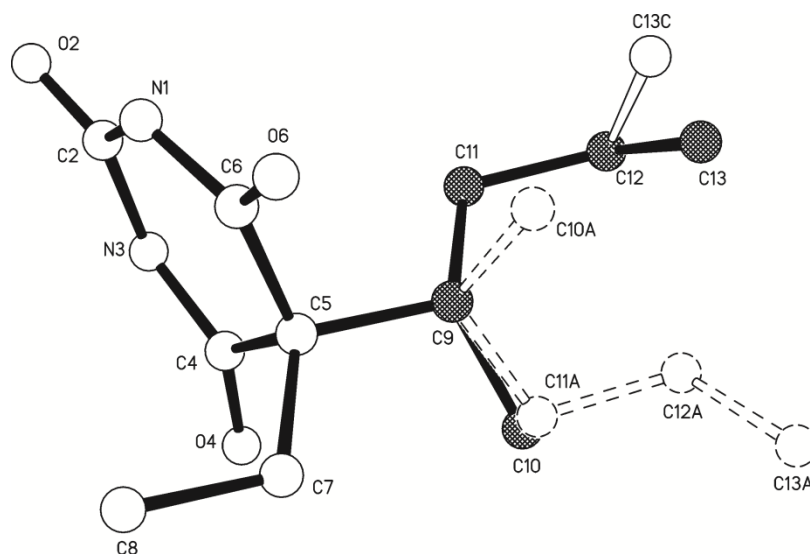

**Fig. S10** Crystal structure of NbtI-II: disorder model for the 1-methylbutyl group of molecule A: C10–C9–C11–C12–C13 (42%) and C10–C9–C11–C12–C13C (43%), C10A–C9A–C11A–C12A–C13A (15%).

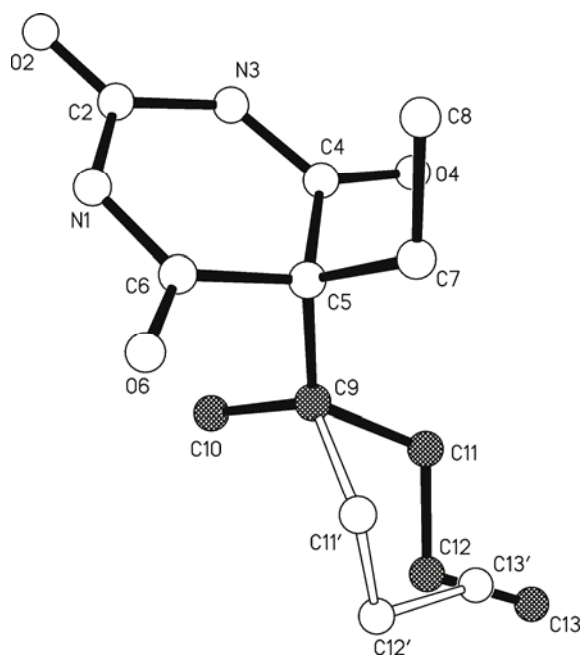

**Fig. S11** Crystal structure of NbtI-IV: disorder model for the 1-methylbutyl group: C10–C9–C11–C12–C13 (59%) and C10–C9–C11'–C12'–C13' (41%).

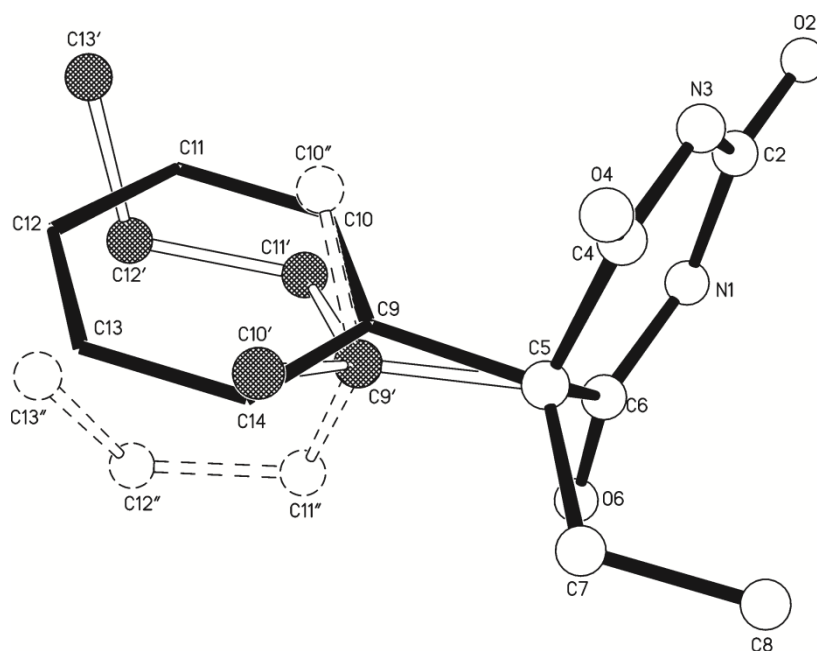

## 5. *XPac* comparison of crystal structures

### 5.1. General

Structure comparisons were carried out with version 2.0 of the program *XPac*.<sup>7</sup> Molecules were represented by the positions of the  $p = 12$  non-H atoms highlighted in Scheme S1. Atoms of the  $R^2$  group were not considered, except for the carbon atom bonded to the C-5 position of the barbiturate ring. Results from these calculations were therefore not directly affected by differences in the composition and conformation of the  $R^2$  group and the obtained dissimilarity indices  $x$  (for  $p = 12$ ) account primarily account for changes in the relative arrangement of molecules.

Additional comparisons between NbtI-**I** and NbtI-**II** (with each independent molecule by represented as by one disorder fragment) and between NbtI-**IV** and form I of vinbarbital<sup>8</sup> (CSD refcode VINBAR) were carried out, in which all  $p = 16$  non-H atomic positions per molecule were used. The dissimilarity index  $x$  obtained from these calculations (i.e. for  $p = 16$ ) accounts for the entirety of geometrical differences between two crystal structures, including conformational differences between  $R^2$  groups.

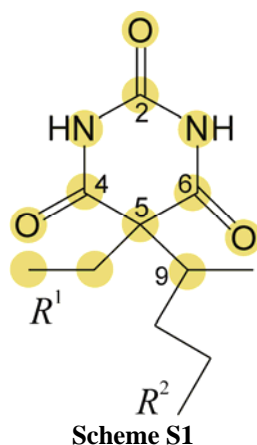

### 5.2. NbtI-**I**, NbtI-**II** NbtI-**Pbtl** and the “Pbtl-X group”

The *XPac* comparisons show that the complete 3D molecular packing arrangement in the co-crystal NbtI-Pbtl agrees with that of those structures which form the Pbtl-X group: AMYTAL11, FUFTAG and BECLIE, despite different space group symmetries. The corresponding lattice vectors and other parameters are compiled Table S2. The calculated dissimilarity indices  $x$  were 6.0, 6.2 and 10.6 for the  $p = 12$  comparisons of NbtI-Pbtl with AMYTAL11, FUFTAG and BECLIE, respectively. Fig. S13 shows an *XPac* plot for the comparison between NbtI-Pbtl and AMYTAL11.



**Table S2** Corresponding lattice parameters within the “Pbtl-X group” of isostructures and parameters in the structures of NbtI-I and NbtI-II which are associated with the common 2D SC (see Fig. S13).

| Structure                | Spg.     | $Z'$ | Lattice vectors |                   |             | Distances / Å |       |       | Angles / °   |              |              | Reference  |
|--------------------------|----------|------|-----------------|-------------------|-------------|---------------|-------|-------|--------------|--------------|--------------|------------|
|                          |          |      | $t_1$           | $t_2$             | $t_3$       | $d_1$         | $d_2$ | $d_3$ | $(t_2, t_3)$ | $(t_1, t_2)$ | $(t_2, t_3)$ |            |
| AMYTAL11 <sup>a,b</sup>  | $P2_1/c$ | 2    | 100             | 001               | 010         | 10.28         | 11.68 | 22.60 | 109.1        | 90           | 90           | 9          |
| NbtI-Pbtl <sup>a,c</sup> | $C2/c$   | 1    | 001             | $\bar{1}0\bar{1}$ | $0\bar{1}0$ | 10.25         | 11.91 | 20.69 | 110.7        | 90           | 90           | This study |
| FUFTAC <sup>a,b</sup>    | $C2/c$   | 1    | 001             | $\bar{1}0\bar{1}$ | 010         | 10.28         | 11.82 | 17.37 | 110.6        | 90           | 90           | 10         |
| BECLIE <sup>a,b</sup>    | $P2_1/c$ | 2    | 001             | 100               | $0\bar{1}0$ | 10.20         | 11.59 | 22.19 | 109.0        | 90           | 90           | 11         |
| NbtI-I                   | $P2_1/c$ | 1    | 001             | 100               | —           | 10.19         | 11.74 | —     | 110.2        | —            | —            | This study |
| NbtI-II                  | $P2_1/c$ | 2    | 001             | 100               | —           | 10.22         | 11.87 | —     | 110.5        | —            | —            | This study |

<sup>a</sup> “Pbtl-X group” of isostructures

<sup>b</sup> CSD refcode

<sup>c</sup> The asymmetric unit contains one barbiturate molecule. However because of the disorder between NbtI and Pbtl,  $Z' = 0.5$  with respect to the composition NbtI-Pbtl

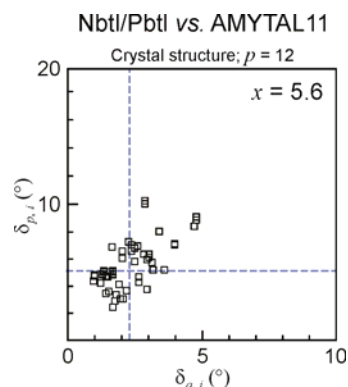

**Fig. S13** XPac plot for the comparison between the structures of NbtI-Pbtl and AMYTAL11, which confirms that they are isostructural, *i.e.* they display the same complete 3D arrangement of molecules.

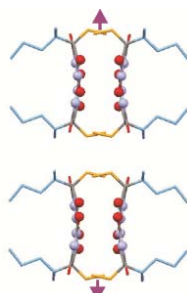

**Fig. S14** The common 2D SC that is present in the crystal structures of the “Pbtl-X group” of isostructures (including the co-crystal NbtI-Pbtl), in NbtI-I and NbtI-II (see also Fig. 6). The layer is viewed parallel to the translation of the N–H···O=C-bonded chain, *i.e.* along the lattice vector  $t_1$  (with  $t_2$  running in vertical direction as indicated by the arrows).

### 5.3. NbtI-IV and form I of vinbarbital

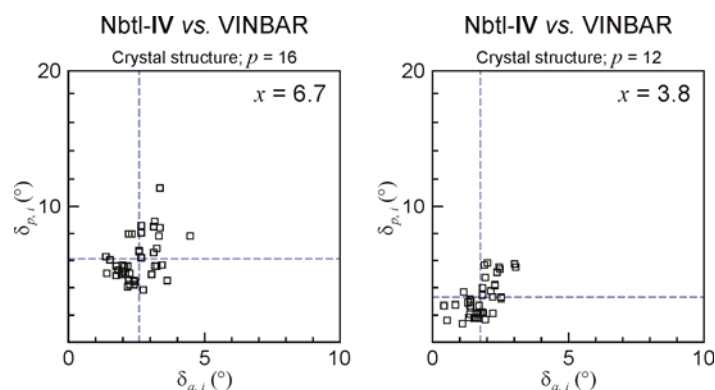

**Fig. S15** *XPac* plots for the comparison of NbtI-IV ( $R^1$  = ethyl,  $R^2$  = 1-methylbutyl) with form I of vinbarbital<sup>8</sup> (CSD: VINBAR;  $R^1$  = ethyl,  $R^2$  = 1-methylbutenyl). Left: The match of representative cluster with  $n = 14$  neighbour molecules based on geometrical parameters calculated from  $p = 16$  non-H atoms gave an overall dissimilarity index  $x$  of 6.7. Right: The analogous procedure gives a significantly lower value of  $x = 3.8$  if the  $R^2$  groups are not included except for the carbon atom attached to the C-5 atom of the barbiturate ring.

**Table S3** Corresponding lattice parameters of NbtI-IV and form I of vinbarbital.

| Structure | Space group | $a/\text{\AA}$ | $b/\text{\AA}$ | $c/\text{\AA}$ | $\beta/^\circ$ | Ref.       |
|-----------|-------------|----------------|----------------|----------------|----------------|------------|
| NbtI-IV   | $P2_1/c$    | 14.514         | 6.834          | 12.497         | 104.76         | This study |
| VINBAR    | $P2_1/c$    | 14.395         | 6.822          | 12.540         | 107.43         | 8          |

## References

1. B. Cleverley and P. P. Williams, *Tetrahedron*, 1959, **7**, 277-288.
2. K. F. Schulte, Dissertation, University of Innsbruck, 1980.
3. R. Fischer, *Arch. Pharm.*, 1939, **277**, 305-321.
4. M. Brandstätter-Kuhnert and M. Aepkers, *Microchim. Acta*, 1962, **50**, 1055-1074.
5. R. J. Mesley, *Spectrochim. Acta, Part A: Mol. and Biomol. Spectroscopy*, 1970, **26**, 1427-1448.
6. T.-Y. Huang and B. Jerslev, *Acta pharmacol. et toxicol.*, 1951, **7**, 227-230.
7. T. Gelbrich and M. B. Hursthouse, *CrystEngComm*, 2005, **7**, 324-336.
8. B. M. Craven and C. Cusatis, *Acta Crystallogr., Sect. B: Struct. Sci.*, 1969, **25**, 2291-2298.
